Development 139, 4291 (2012) doi:10.1242/dev.090324  
© 2012. Published by The Company of Biologists Ltd

## Mechanism of pectoral fin outgrowth in zebrafish development Tohru Yano, Gembu Abe, Hitoshi Yokoyama, Koichi Kawakami and Koji Tamura

There was an error published in *Development* **139**, 2916-2925.

The last reference in the list was truncated. It should read:

**Zhang, J., Wagh, P., Guay, D., Sanchez-Pulido, L., Padhi, B. K., Korzh, V., Andrade-Navarro, M. A. and Akimenko, M. A.** (2010). Loss of fish actinotrichia proteins and the fin-to-limb transition. *Nature* **466**, 234-237.

We apologise to the authors and readers for this mistake.
